# Supplementary material for: Application of the Full Spectrum Inversion Algorithm for Airborne GPS Radio Occultation Measurements
Source: Copernicus journal article supplement (doi:10.5194/amt-2015-378), 2016-01-18
Supplement: Supplementary file [file amt-2015-378-RC1-supplement.pdf]

This document is intended for editors only and not for the paper authors.

Overall there are too many references to an unpublished work (Wang et al., 2015). This makes it difficult to evaluate several statements in the paper. Perhaps the paper should be held until this companion paper is accepted? If there are significant flaws in Wang et al., 2015, that will definitely affect the viability of this paper.
